# Supplementary material for: Application of rational enzyme engineering in a new route to etonogestrel and levonorgestrel: carbonyl reductase bioreduction of ethyl secodione
Source: Royal Society of Chemistry journal article supplement (doi:10.1039/d4fd00011k), 2024-01-01
Supplement: d4fd00011k1.pdf [file d4fd00011k1.pdf]

**Application of rational enzyme engineering in a new route to  
Etonorgestrel and Levonorgestrel: Carbonyl reductase bioreduction  
of ethyl secodione**

Daniel F.A.R. Dourado<sup>a</sup>, Andrew S. Rowan<sup>a</sup>, Sergej Maciuk<sup>a</sup>, Jenny Spratt<sup>a</sup>, Gareth Brown<sup>a</sup>, Darren Gray<sup>a</sup>, Jill Caswell<sup>a</sup>, Alexandra A.T.P. Carvalho<sup>a</sup>, Fernando Tur<sup>a</sup>, Dražen Pavlović<sup>a</sup>, Derek J. Quinn<sup>a</sup>, Thomas S. Moody<sup>a</sup> and Stefan Mix<sup>a\*</sup>

<sup>a</sup> Almac Sciences, Department of Biocatalysis and Isotope Chemistry, UK

Table S1 - Screening of the CREDS from Almac's selectAZyme™ panel. Data of the best enzymes (with minimal formation of ethyl secodiols) are shown. Reaction conditions: 10 mg CRED as lyophilised cell free extract (CFE), 0.5 mg each NAD and NADP, 1 mg glucose dehydrogenase (GDH), 10 mg glucose monohydrate, 2 mg of **4** in 50 µL DMSO, 950 µL 0.1 M potassium phosphate buffer (pH 7) in microcentrifuge tube, shaking overnight at 30 °C).

| CRED        | % Conversion | % HPLC peak area (products only) |             |             |             |        |        |
|-------------|--------------|----------------------------------|-------------|-------------|-------------|--------|--------|
|             |              | (13S,17R)-5                      | (13R,17S)-5 | (13S,17S)-5 | (13R,17R)-5 | Diol A | Diol B |
| 1           | 100.00       | 0.06                             | 98.53       | 0.03        | 0.10        | 1.11   | 0.16   |
| 2           | 75.04        | 3.04                             | 0.00        | 7.40        | 88.94       | 0.36   | 0.27   |
| 3           | 100.00       | 0.05                             | 99.34       | 0.07        | 0.12        | 0.21   | 0.21   |
| 4           | 100.00       | 0.05                             | 99.54       | 0.03        | 0.08        | 0.13   | 0.17   |
| 5           | 57.53        | 83.32                            | 0.31        | 0.93        | 14.85       | 0.10   | 0.49   |
| 6           | 100.00       | 0.08                             | 0.14        | 99.16       | 0.39        | 0.15   | 0.09   |
| 7 (CRED-BW) | 100.00       | 0.04                             | 98.57       | 0.12        | 0.00        | 1.27   | 0.00   |
| 8           | 93.86        | 0.00                             | 0.04        | 99.57       | 0.30        | 0.10   | 0.00   |
| 9           | 100.00       | 0.00                             | 99.13       | 0.06        | 0.03        | 0.69   | 0.09   |
| 10          | 100.00       | 0.51                             | 0.06        | 98.44       | 0.49        | 0.50   | 0.00   |
| 11          | 99.81        | 0.50                             | 0.09        | 98.68       | 0.24        | 0.49   | 0.00   |

Table S2 - Screening of the CREDS from Almac's selectAZyme™ panel. Data of the best enzymes at 20 and 50 wt % of CRED loading.

| CRED    | CRED loading (wt % wrt <b>4</b> ) | % Conv | % HPLC peak area (products only) |              |             |             |        |        |
|---------|-----------------------------------|--------|----------------------------------|--------------|-------------|-------------|--------|--------|
|         |                                   |        | (13S,17R)-5                      | (13R,17S)-5  | (13S,17S)-5 | (13R,17R)-5 | Diol A | Diol B |
| 1       | 50                                | 97.42  | 0.59                             | <b>98.87</b> | 0.31        | 0.00        | 0.23   | 0.00   |
| 3       |                                   | 31.52  | 1.06                             | <b>98.67</b> | 0.19        | 0.08        | 0.00   | 0.00   |
| 4       |                                   | 94.92  | 0.39                             | <b>99.53</b> | 0.03        | 0.00        | 0.04   | 0.00   |
| CRED-BW |                                   | 99.67  | 0.37                             | <b>99.10</b> | 0.03        | 0.03        | 0.46   | 0.00   |
| 9       |                                   | 18.76  | 1.51                             | <b>97.86</b> | 0.38        | 0.11        | 0.14   | 0.00   |
| 1       | 20                                | 45.48  | 1.42                             | <b>98.04</b> | 0.38        | 0.00        | 0.16   | 0.00   |
| 4       |                                   | 55.39  | 0.63                             | <b>99.34</b> | 0.03        | 0.00        | 0.00   | 0.00   |
| CRED-BW |                                   | 99.93  | 0.38                             | <b>99.48</b> | 0.14        | 0.00        | 0.00   | 0.00   |

Table S3 - CRED-BW amino acid sequence

| Code    | Organism               | Sequence                                                                                                                                                                                                                                                                          |
|---------|------------------------|-----------------------------------------------------------------------------------------------------------------------------------------------------------------------------------------------------------------------------------------------------------------------------------|
| CRED-BW | Bacillus<br>wiedmannii | MKYTVITGASSGIGYESALAFASRGKNLILVARRQEELDGLKLNEMNPELDVIRRTDLSITENVYKL<br>YESLQTFQIETWINNAGFGNFASIAEQNLNKIETMLHVNIEALTILSSLFVRDYSMVDGTQLINVSSGG<br>G<br>YTIVADAVTYCATKFYVSATFEGLSHELKEQGAKLQAKVLAPAAETETEFAKRSLDIDEFQYNNVVPKFH<br>T<br>AKQMAQFMLDLYSDKVVGIVDGYTYNYELKNPIFNFAVRKTNSSS |

Table S4 – CRED-BW Co-Solvent analysis. Screening conditions (0.1 mg (5% w/w) or 0.01 mg (0.5% w/w) CRED-BW (CFE), 0.5 mg NADP, 1 mg glucose dehydrogenase (GDH), 5 mg glucose monohydrate (excess), 2 mg **4** in 50 µL DMSO (5% v/v overall co-solvent), 950 µL 0.1 M potassium phosphate buffer (pH 7)).

| Co-solvent | % (v/v) co-solvent | % (w/w) CRED | % Conv       |
|------------|--------------------|--------------|--------------|
| DMSO       | 5                  | 0.5          | <b>91.99</b> |
|            | 10                 | 0.5          | <b>96.91</b> |
|            | 15                 | 0.5          | <b>97.78</b> |
|            | 30                 | 0.5          | 70.70        |
|            |                    | 5            | <b>99.92</b> |
|            | 50                 | 0.5          | 7.89         |
| 5          |                    | 24.16        |              |
| MTBE       | 10                 | 0.5          | 20.33        |
|            |                    | 5            | 74.50        |
| Toluene    | 10                 | 0.5          | 15.31        |
|            |                    | 5            | 21.37        |
| EtOAc      | 10                 | 0.5          | 9.52         |
|            |                    | 5            | 34.49        |
| Acetone    | 10                 | 0.5          | 75.17        |
|            |                    | 5            | <b>99.29</b> |
| i-PrOAc    | 10                 | 0.5          | 4.06         |
|            |                    | 5            | 29.88        |
| CPME       | 10                 | 0.5          | 2.79         |
|            |                    | 5            | 25.12        |
| DIPE       | 10                 | 0.5          | 22.51        |
|            |                    | 5            | 77.73        |
| MeTHF      | 10                 | 0.5          | 7.64         |
|            |                    | 5            | 29.44        |
| EtOH       | 10                 | 0.5          | 86.57        |

|                   |    |     |              |
|-------------------|----|-----|--------------|
|                   |    | 5   | <b>99.89</b> |
| IPA               | 10 | 0.5 | 85.35        |
|                   |    | 5   | <b>99.82</b> |
| 1-Octanol         | 10 | 0.5 | 29.68        |
|                   |    | 5   | 82.00        |
| 2-Octanol         | 10 | 0.5 | 18.86        |
|                   |    | 5   | 75.02        |
| 2-Ethyl-1-Hexanol | 10 | 0.5 | 18.18        |
|                   |    | 5   | 71.37        |

Table S5 - CRED-BW temperature analysis. Screening conditions (0.005 mg (0.25% w/w) CRED-BW (CFE), 0.5 mg NADP, 1 mg glucose dehydrogenase (GDH), 5 mg glucose monohydrate (excess), 2 mg **4** in 50  $\mu$ L DMSO (5% v/v overall co-solvent), 950  $\mu$ L 0.1 M potassium phosphate buffer (pH 7)).

| Temperature ( $^{\circ}$ C) | % Conv | % HPLC peak area (products only) |              |             |             |        |        |
|-----------------------------|--------|----------------------------------|--------------|-------------|-------------|--------|--------|
|                             |        | (13S,17R)-5                      | (13R,17S)-5  | (13S,17S)-5 | (13R,17R)-5 | Diol A | Diol B |
| 25                          | 25.03  | 1.27                             | <b>98.73</b> | 0.00        | 0.00        | 0.00   | 0.00   |
| 30                          | 45.64  | 0.72                             | <b>99.28</b> | 0.00        | 0.00        | 0.00   | 0.00   |
| 35                          | 64.54  | 0.56                             | <b>99.44</b> | 0.00        | 0.00        | 0.00   | 0.00   |
| 40                          | 38.84  | 1.15                             | <b>98.85</b> | 0.00        | 0.00        | 0.00   | 0.00   |

Table S6 - CRED-BW pH analysis. Screening conditions (0.005 mg (0.25% w/w) CRED-BW lyophilised cell free extract (CFE), 0.5 mg NADP, 1 mg glucose dehydrogenase (GDH), 5 mg glucose monohydrate (excess), 2 mg **4** in 50  $\mu$ L DMSO (5% v/v overall co-solvent), 950  $\mu$ L 0.1 M potassium phosphate buffer (of desired pH), shaken at 35  $^{\circ}$ C overnight).

| pH  | % Conv       |
|-----|--------------|
| 6.2 | 49.42        |
| 6.6 | 73.67        |
| 7.0 | <b>79.92</b> |
| 7.4 | 68.86        |
| 7.8 | 44.39        |

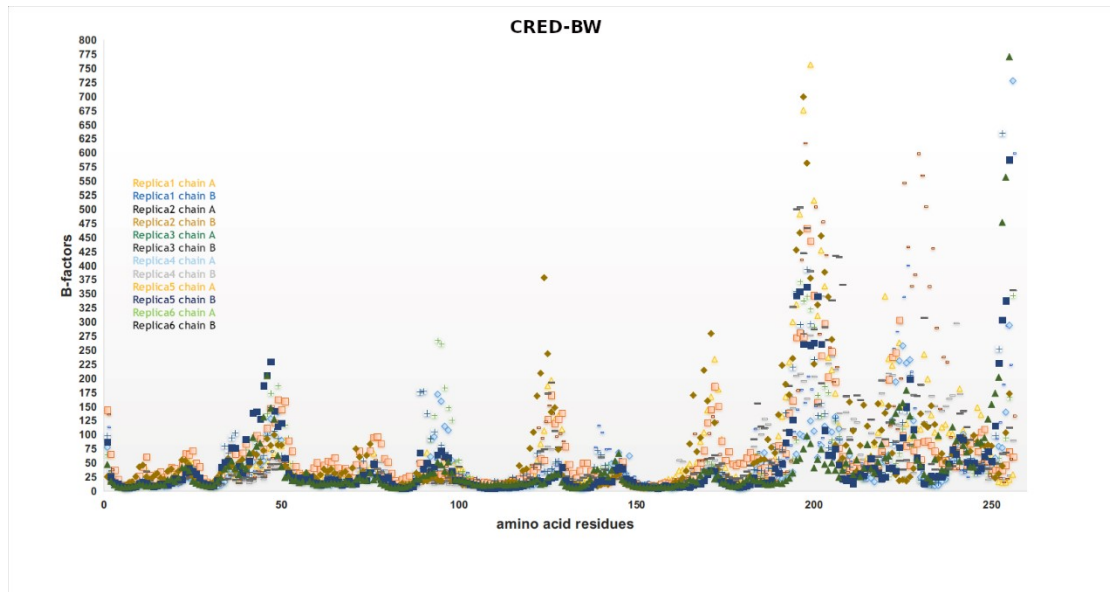

Figure S1: B-factor values for CRED-BW.

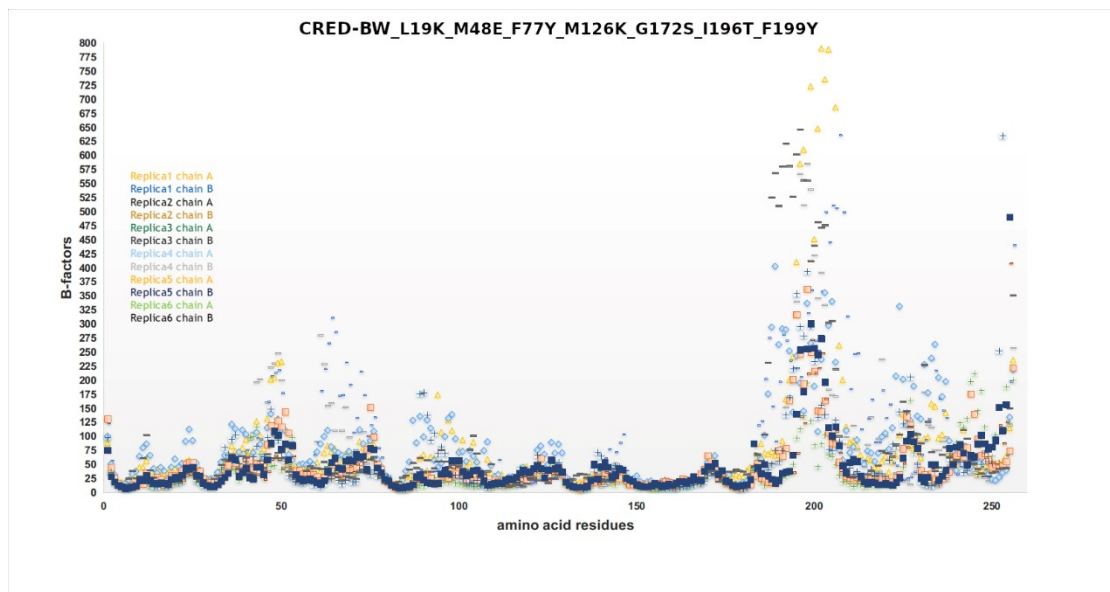

Figure S2: B-factor values for CRED-BW\_L19K\_M48E\_F77Y\_M126K\_G172S\_I196T\_F199Y.

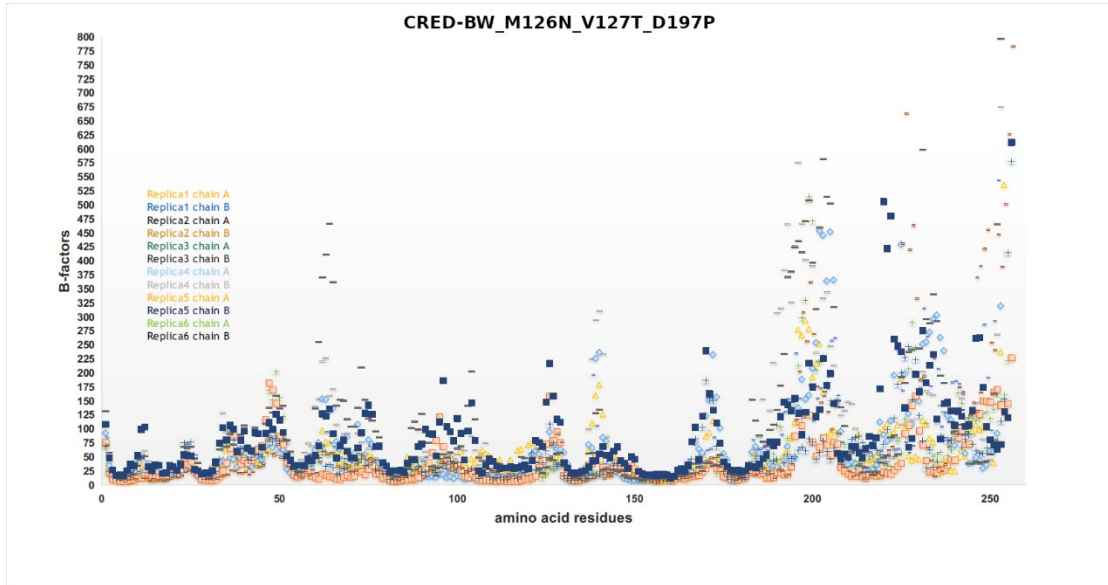

Figure S3: B-factor values for CRED-BW\_M126N\_V127T\_D197P.

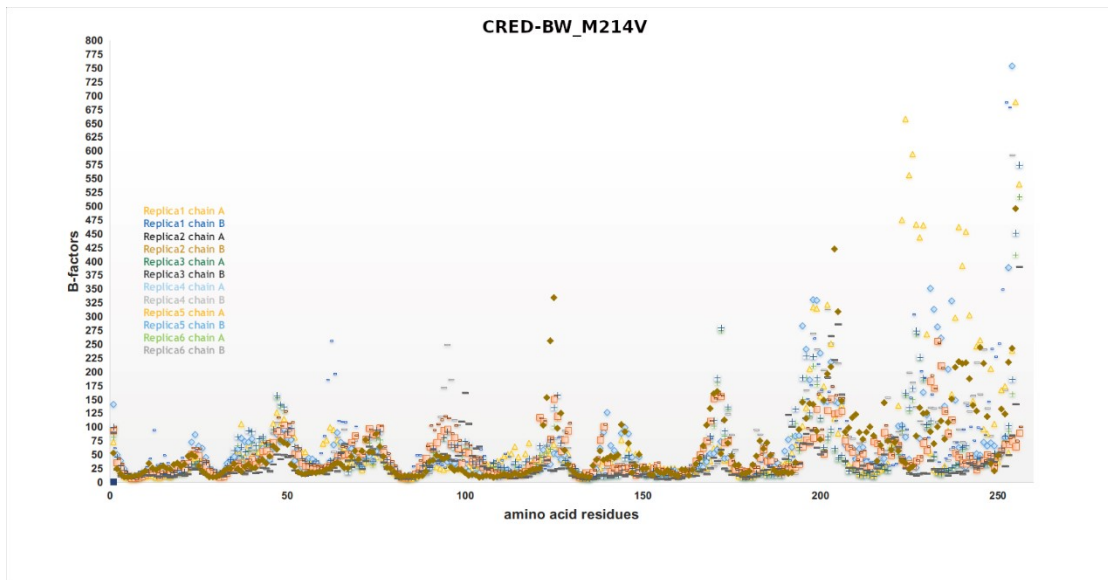

Figure S4 - B-factor values for CRED-BW\_M214V

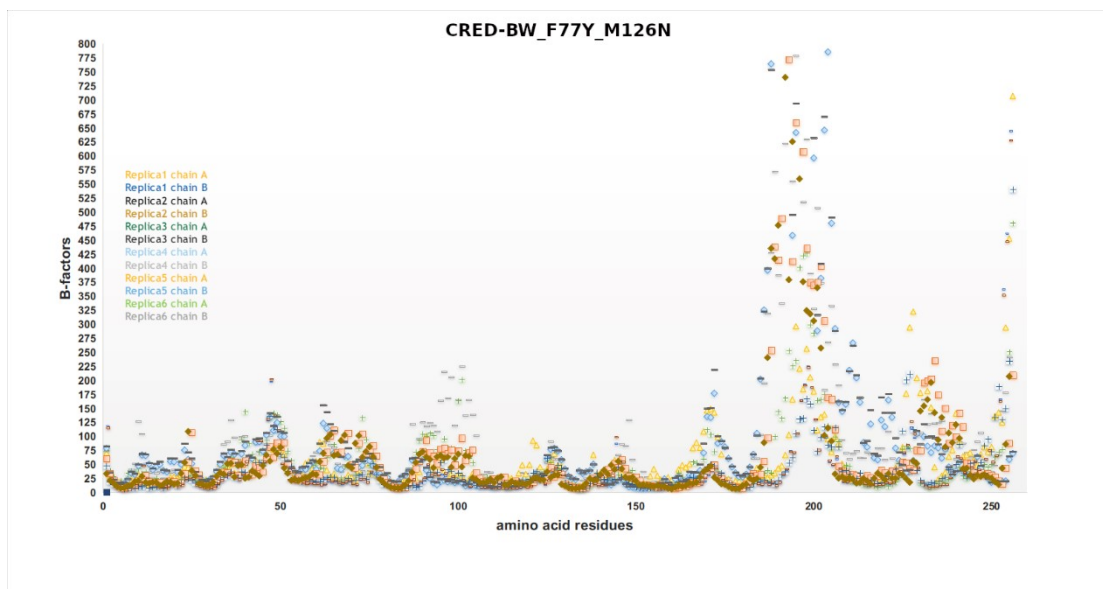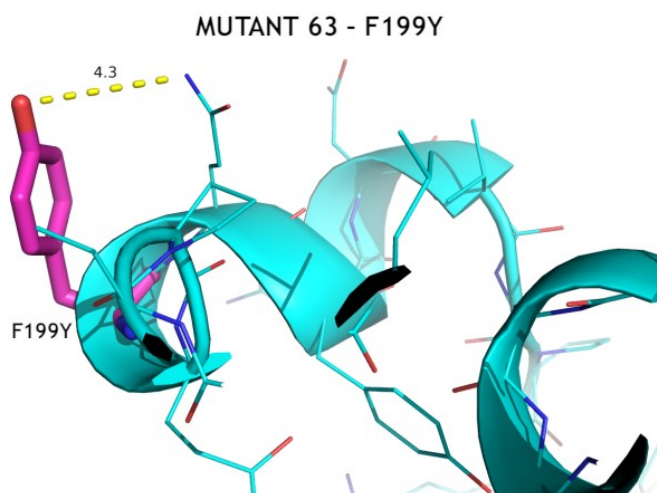

Figure S6 - Mutant 63 - F199Y.

**MUTANT 65 - CRED-BW\_M126N\_V127T\_D197P**

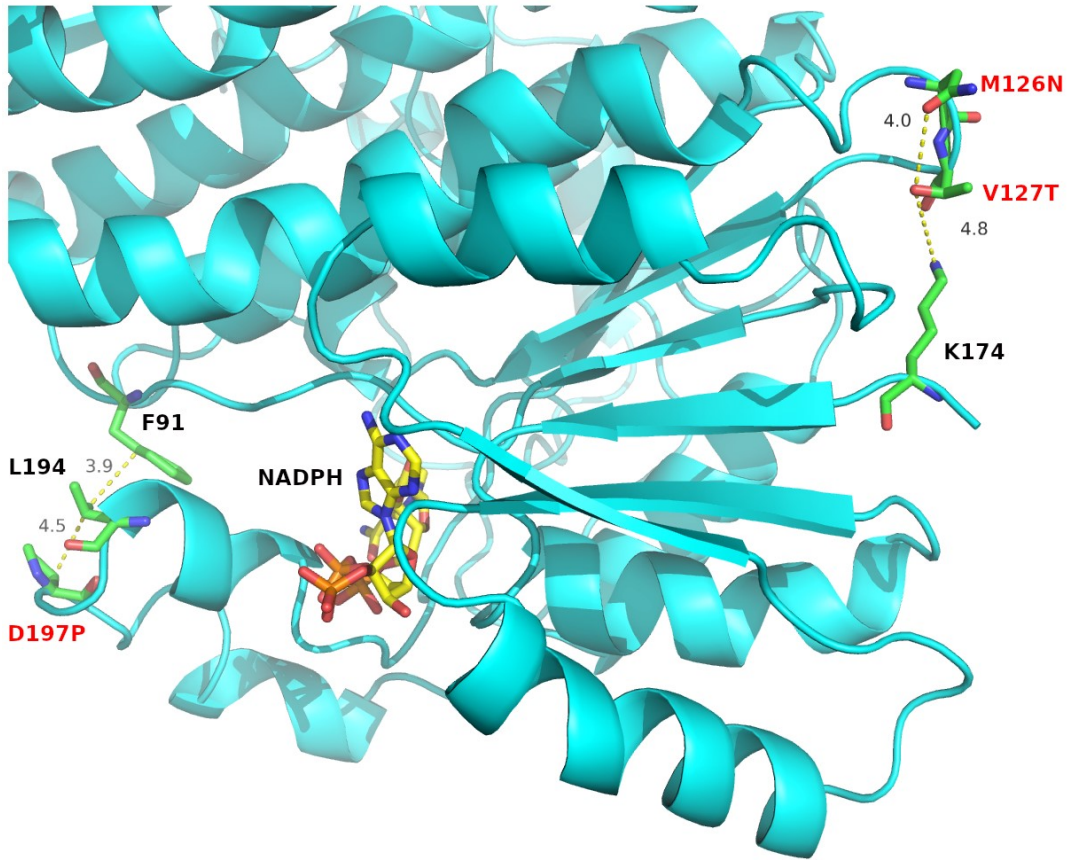

*Figure S7 - Mutant 65 - M126N\_V127T\_D197P*

**MUTANT 67 - D225R**

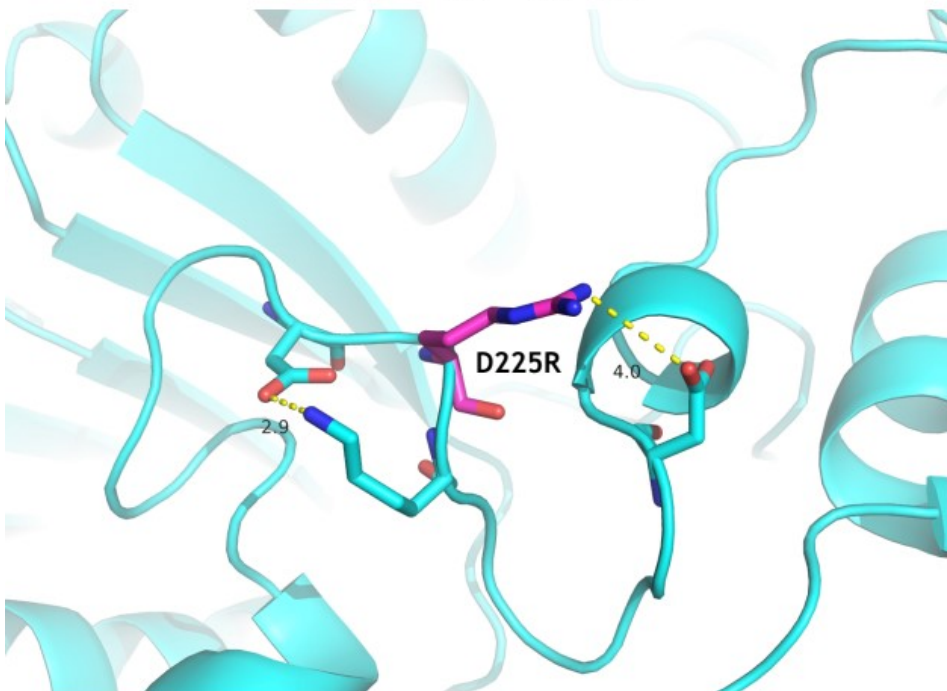

*Figure S8 - Mutant 67 - D225R*



## MUTANT 81 - T59C\_V31C

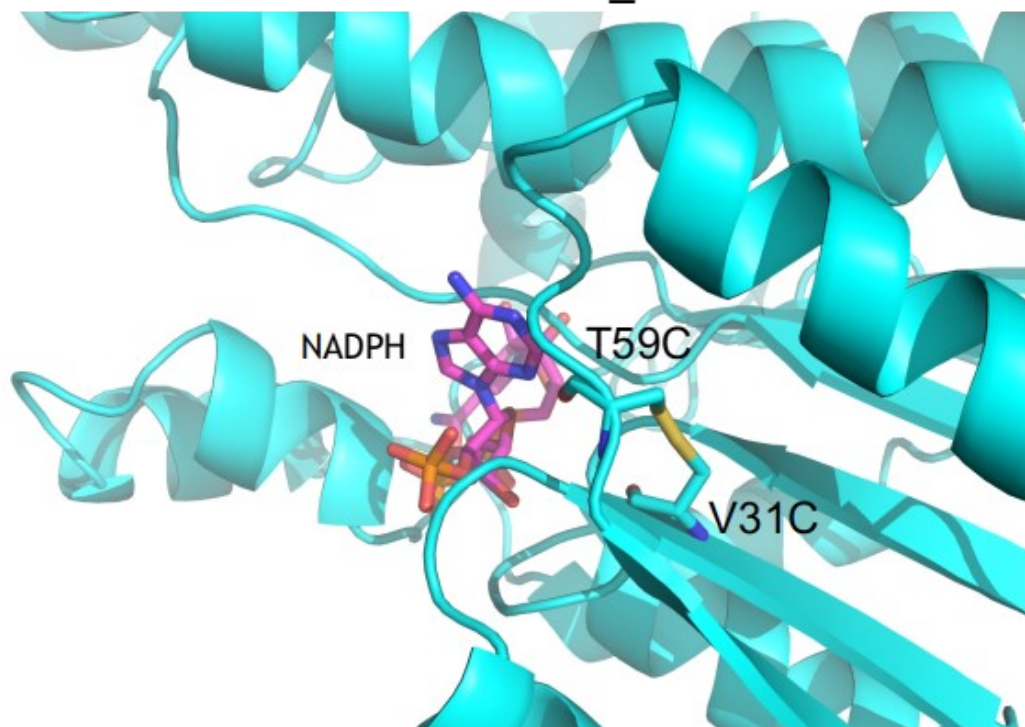

Figure S9 - Mutant 81 - T59C\_V31C

Table 7 - CRED-BW mutants

| Mutants        | Reasoning         |
|----------------|-------------------|
| MUT1-S17V      | Thermal stability |
| MUT2-L19E      | Thermal stability |
| MUT3-L19K      | Thermal stability |
| MUT4-L19R      | Thermal stability |
| MUT5-L19R_M48E | Thermal stability |
| MUT6-L19K_M48E | Thermal stability |
| MUT7-L19E_M48K | Thermal stability |
| MUT8-L19K_M48K | Thermal stability |
| MUT9-L19K_M48R | Thermal stability |
| MUT10-M48E     | Thermal stability |
| MUT11-M48K     | Thermal stability |
| MUT12-M48R     | Thermal stability |
| MUT13-M48I     | Thermal stability |
| MUT14-M48L     | Thermal stability |
| MUT15-T76E     | Thermal stability |

|                        |                   |
|------------------------|-------------------|
| MUT16-F77Y             | Thermal stability |
| MUT17-M126R            | Thermal stability |
| MUT18-M126K            | Thermal stability |
| MUT19-M126E            | Thermal stability |
| MUT20-M126N            | Thermal stability |
| MUT21-V127S            | Thermal stability |
| MUT22-V127T            | Thermal stability |
| MUT23-G172Q            | Thermal stability |
| MUT24-G172N            | Thermal stability |
| MUT25-G172K            | Thermal stability |
| MUT26-G172S            | Thermal stability |
| MUT27-G172E            | Thermal stability |
| MUT28-G172D            | Thermal stability |
| MUT29-G172P            | Thermal stability |
| MUT30-M126K_G172S      | Thermal stability |
| MUT31-M126K_G172D      | Thermal stability |
| MUT32-M126K_G172K      | Thermal stability |
| MUT33-M126E_G172D      | Thermal stability |
| MUT34-M126N_F77Y       | Thermal stability |
| MUT35-M126K_F77Y       | Thermal stability |
| MUT36-V127T_M126N      | Thermal stability |
| MUT37-V127S_M126N      | Thermal stability |
| MUT38-V127T_M126N_F77Y | Thermal stability |
| MUT39-I196S            | Thermal stability |
| MUT40-I196T            | Thermal stability |
| MUT41-I196G            | Thermal stability |
| MUT42-I196K            | Thermal stability |
| MUT43-I196E            | Thermal stability |
| MUT44-D197P            | Thermal stability |
| MUT45-D197K            | Thermal stability |
| MUT46-D197S            | Thermal stability |
| MUT47-D197N            | Thermal stability |
| MUT48-D197T            | Thermal stability |
| MUT49-D197E            | Thermal stability |
| MUT50-V135I            | Thermal stability |
| MUT51-E198S            | Thermal stability |
| MUT52-E198T            | Thermal stability |
| MUT53-E198Q            | Thermal stability |
| MUT54-E198N            | Thermal stability |
| MUT55-V125L            | Thermal stability |
| MUT56-E198L            | Thermal stability |
| MUT57-F199S            | Thermal stability |

|                             |                                           |
|-----------------------------|-------------------------------------------|
| MUT58-F199T                 | Thermal stability                         |
| MUT59-F199Q                 | Thermal stability                         |
| MUT60-F199N                 | Thermal stability                         |
| MUT61-F199H                 | Thermal stability                         |
| MUT62-F199G                 | Thermal stability                         |
| MUT63-F199Y                 | Thermal stability                         |
| MUT64-I196T_F199Y           | Thermal stability                         |
| MUT65-V127T_M126N_D197P     | Thermal stability                         |
| MUT66-D225K                 | Thermal stability                         |
| MUT67-D225R                 | Thermal stability                         |
| MUT68-L219Y                 | Thermal stability                         |
| MUT69-L219T                 | Thermal stability                         |
| MUT70-L219D                 | Thermal stability                         |
| MUT71-M105I                 | Stability/Methionine oxidation prevention |
| MUT72-M105L                 | Stability/Methionine oxidation prevention |
| MUT73-M105E                 | Stability/Methionine oxidation prevention |
| MUT74-M105Q                 | Stability/Methionine oxidation prevention |
| MUT75-M214V                 | Stability/Methionine oxidation prevention |
| MUT76-M214I                 | Stability/Methionine oxidation prevention |
| MUT77-M214T<br>MUT778-M218A | Stability/Methionine oxidation prevention |
| MUT79-M218I                 | Stability/Methionine oxidation prevention |
| MUT80-M218S                 | Stability/Methionine oxidation prevention |
| MUT81- V31C_T59C            | Stability / SSbond                        |
| MUT82- L116C_W82C           | Stability / SSbond                        |
| MUT83- V31C_T59C_L116C-W82C | Stability / SSbond                        |
| Mut84- E37K                 | Stability in organic solvent              |
| Mut85-K44E                  | Stability in organic solvent              |
| Mut86-E80K                  | Stability in organic solvent              |
| Mut87-D128K                 | Stability in organic solvent              |
| Mut88-K169E                 | Stability in organic solvent              |
| Mut89-E188K                 | Stability in organic solvent              |
| Mut90-K191E                 | Stability in organic solvent              |
| Mut91-K191D                 | Stability in organic solvent              |
| Mut92-R192D                 | Stability in organic solvent              |
| Mut93-R192E                 | Stability in organic solvent              |
